# Supplementary material for: TCR-triggered extracellular superoxide production is not required for T-cell activation
Source: PubMed Central journal article supplement (PMC4237797; doi:10.1186/s12964-014-0050-1), 2014-08-01

A

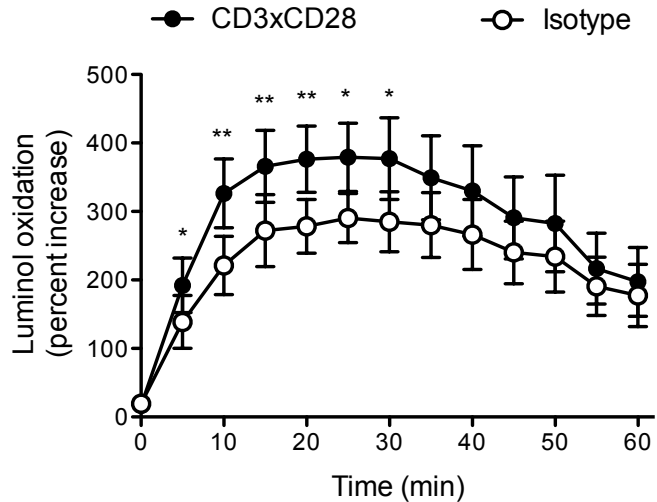

B

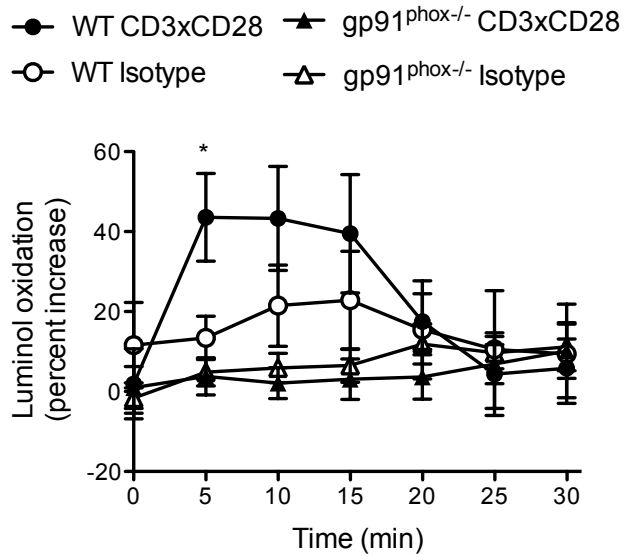

Supplement: s12964-014-0050-1-S2.pdf [file s12964-014-0050-1-S2.pdf]
